# Supplementary material for: A New Bacillus velezensis Strain CML532 Improves Chicken Growth Performance and Reduces Intestinal Clostridium perfringens Colonization
Source: MDPI journal article supplement (doi:10.3390/microorganisms12040771), 2024-04-11
Supplement: s1 [file s1]

## Supplementary Materials

### 2. Materials and methods

#### 2.1. Acid, bile salt and high temperature tolerance assay

For acid and bile salt tolerance assays, 0.1 mL of an overnight liquid culture of *Bacillus velezensis* strains was inoculated into 10 mL of LB broth adjusted to pH 2 or 3 in advance, or into LB medium containing 0.3% or 0.4% (w/v) Oxgall (Beijing Solarbio Science & Technology Co., Ltd., Beijing, China) to imitate gastric juice at 37°C for 2 h. After incubation, the cell viability was determined by serial dilution and plating onto LB agar following a 12-hour incubation. Isolates that exhibit resistance above 80% at pH 3 are considered to be acid-tolerant strains. For temperature tolerance assay, 1 mL of *B. velezensis* liquid culture was immersed in a water bath at room temperature, 85°C and 90°C for 10 min, then cooled to room temperature, and incubated at 37°C for 12 h. Survival rate (%) = Final (Log CFU/mL)/Initial (Log CFU/mL) × 100%.

#### 2.2. Protease assay

LB medium containing 1% skim milk powder was prepared, and a sterile hole punch with a diameter of 6 µm was used to drill holes in the medium. The supernatant of 50 µL *B. velezensis* was added to the well and cultured at 37°C for 24 h. Add 2 mL iodine solution and observe whether there is a transparent circle.

#### 2.3. Amylase assay

LB medium containing 1% soluble starch (Sangon Biotech (Shanghai) Co., Ltd., Shanghai, China) was prepared, and a sterile hole punch with a diameter of 6 µm was used to drill holes in the medium. The supernatant of 50 µL *B. velezensis* was added to the well and cultured at 37°C for 24 h. Add 2 mL iodine solution and observe whether there is a transparent circle.

#### 2.4. Cellulase assay

A sterilized hole punch with a diameter of 6 µm was used to punch holes in LB agar containing 1% carboxymethylcellulose sodium (Sangon Biotech (Shanghai) Co., Ltd., Shanghai, China), and then a sterile needle was used to pick out the drilled medium. The

supernatant of 50 µL *B. velezensis* fermentation broth was added to the well and cultured at 37°C for 24 h. Add 2 mL 0.2% congo red solution for 30 min, and replace 3 mL 1 M NaCl solution elute for 15 min, and observe whether there is a transparent circle.

### 2.5. Antibacterial Ability Test

The antimicrobial activity of *B. velezensis* against pathogenic bacteria *E. coli*, *S. typhimurium*, and *C. perfringens* was determined by the oxford cup method in accordance with Muhammad et al. [1]. Briefly, a 1% inoculum of pathogenic bacteria cultured overnight was plated onto LB agar. After the plate was dried, oxford cups were put onto the plate equidistantly with 30 µL test strains culture solution in each cup at 37°C for 24 h. The 100 µg/mL ampicillin and non-cultured MRS broth were used as positive and negative controls, respectively.

### 2.6. Antibiotic susceptibility assay

Antibiotic susceptibility was determined according to the Clinical and Laboratory Standards Institute (CLSI, 2010). The bacterial suspension was inoculated by swabbing on LB agar. After drying, the antibiotics discs were placed on the surface of the agar. The presence or absence of inhibition zones around the discs was recorded after incubation for 24 h at 37°C.

### 2.7. Intestinal lesion score

The small intestine of each chicken was cut longitudinally and scored blindly as described by Dahiya et al. [2] with some modifications. Lesions were assessed on a 0 to 4 scale. 0 = no gross lesions; 0.5 = severe congestive serous and mesenteric hyperemia; 1 = thin-walled, and brittle intestines with small hemorrhagic spots; 2 = small amount of gas production and focal necrotic lesions; 3 = gas-filled intestine and necrotic plaques (1–2 cm long); and 4 = large amount of gas and diffuse necrosis in the intestines.

## References

1. Muhammad, Z.; Ramzan, R.; Abdelazez, A.; Amjad, A.; Afzaal, M.; Zhang, S. and Pan, S. Assessment of the antimicrobial potentiality and functionality of *Lactobacillus plantarum* strains isolated from the conventional inner mongolian fermented cheese against foodborne pathogens. *Pathogens* **2019**, *8*, 71. <https://doi.org/10.3390/pathogens8020071>.
2. Dahiya, J. P.; Hoehler, D.; Wilkie, D. C.; Van Kessel, A. G. and Drew, M. D. Dietary

glycine concentration affects intestinal *clostridium perfringens* and *lactobacilli* populations in broiler chickens. *Poult. Sci.* **2005**, *84*, 1875-1885.  
<https://doi.org/10.1093/ps/84.12.1875>.

**Table S1.** Ingredients and nutrient composition of experimental diets used in experiment 1, as-fed basis.

| Ingredient, %                            | d 1–21   | d 22–42  |
|------------------------------------------|----------|----------|
| Corn                                     | 56.05    | 59.87    |
| Soybean meal (CP > 44%)                  | 35.68    | 30.18    |
| Soy oil                                  | 2.60     | 3.80     |
| Corn gluten meal (CP > 51.3%)            | 2.00     | 2.90     |
| Limestone                                | 0.80     | 0.98     |
| Dicalcium phosphate                      | 1.90     | 1.41     |
| Salt                                     | 0.30     | 0.30     |
| Methionine (99%, DL-form)                | 0.22     | 0.10     |
| Choline (50%)                            | 0.20     | 0.20     |
| Vitamin premix <sup>1</sup>              | 0.02     | 0.03     |
| Mineral premix <sup>2</sup>              | 0.20     | 0.20     |
| Ethoxyquin (66%)                         | 0.03     | 0.03     |
| <i>B. velezensis</i> premix <sup>3</sup> | 0.00     | 0.00     |
| Total                                    | 100.00   | 100.00   |
| Calculated composition (%) <sup>4</sup>  |          |          |
| Crude protein                            | 21.54    | 20.00    |
| Metabolizable energy (Kcal/kg)           | 2,970.00 | 3,095.00 |
| Calcium                                  | 1.00     | 0.90     |
| Available phosphorous                    | 0.51     | 0.40     |
| Lysine                                   | 1.21     | 1.07     |

<sup>1</sup> Provide per kilogram of vitamin premix: vitamin A, 50 million IU; vitamin D<sub>3</sub>, 12 million IU; vitamin E, 0.1 million IU; vitamin K<sub>3</sub>, 10 g; vitamin B<sub>1</sub>, 8 g; vitamin B<sub>2</sub>, 32 g; vitamin B<sub>6</sub>, 12 g; vitamin B<sub>12</sub>, 100 mg; nicotinamide, 150 g; D-pantothenic acid, 46 g; folic acid, 5 g; biotin, 500 mg

<sup>2</sup> Provide per kilogram of mineral premix: copper, 8 g; iron, 40 g; zinc, 55 g; manganese, 60 g; iodine, 750 mg; selenium, 150 mg; cobalt, 250 mg.

<sup>3</sup> *Bacillus velezensis* premix was added at the expense of corn to supply 0 or  $1 \times 10^9$  CFU/kg diet

<sup>4</sup> Calculated values based on the analyzed data for the experimental diets

**Table S2.** Ingredients and nutrient composition of experimental diets used in experiment 2, as-fed basis.

| <b>Ingredient, %</b>                     | <b>d 1–21</b> | <b>d 22–42</b> |
|------------------------------------------|---------------|----------------|
| Corn                                     | 56.77         | 59.87          |
| Soybean meal (CP > 44%)                  | 34.11         | 30.18          |
| Soy oil                                  | 2.64          | 3.80           |
| Corn gluten meal (CP > 51.3%)            | 2.5           | 2.90           |
| Limestone                                | 0.88          | 0.98           |
| Dicalcium phosphate                      | 1.89          | 1.41           |
| Salt                                     | 0.35          | 0.30           |
| Methionine (99%, DL-form)                | 0.19          | 0.10           |
| L-lysinehydrochloride (78%)              | 0.11          | 0.14           |
| Choline (50%)                            | 0.30          | 0.20           |
| Vitamin premix <sup>1</sup>              | 0.03          | 0.03           |
| Mineral premix <sup>2</sup>              | 0.20          | 0.20           |
| Ethoxyquin (66%)                         | 0.03          | 0.03           |
| <i>B. velezensis</i> premix <sup>3</sup> | 0.00          | 0.00           |
| Total                                    | 100.00        | 100.00         |
| Calculated composition (%) <sup>4</sup>  |               |                |
| Crude protein                            | 21.54         | 20.00          |
| Metabolizable energy (Kcal/kg)           | 2,970         | 3,100          |
| Calcium                                  | 1.00          | 0.90           |
| Available phosphorous                    | 0.51          | 0.40           |
| Lysine                                   | 1.21          | 1.07           |

<sup>1</sup> Provide per kilogram of vitamin premix: vitamin A, 50 million IU; vitamin D<sub>3</sub>, 12 million IU; vitamin E, 0.1 million IU; vitamin K<sub>3</sub>, 10 g; vitamin B<sub>1</sub>, 8 g; vitamin B<sub>2</sub>, 32 g; vitamin B<sub>6</sub>, 12 g; vitamin B<sub>12</sub>, 100 mg; nicotinamide, 150 g; D-pantothenic acid, 46 g; folic acid, 5 g; biotin, 500 mg

<sup>2</sup> Provide per kilogram of mineral premix: copper, 8 g; iron, 40 g; zinc, 55 g; manganese, 60 g; iodine, 750 mg; selenium, 150 mg; cobalt, 250 mg.

<sup>3</sup> *Bacillus velezensis* premix was added at the expense of corn to supply 0 or  $1 \times 10^9$  CFU/kg diet

<sup>4</sup> Calculated values based on the analyzed data for the experimental diets

**Table S3.** Forward and reverse primers for quantitative PCR.

| Gene             | Accession no.  | Primer sequence (5'-3')                                | Accession no. |
|------------------|----------------|--------------------------------------------------------|---------------|
| <i>β-actin</i>   | L08165         | F: GAGAAATTGTGCGTGACATCA<br>R: CCTGAACCTCTCATTGCCA     |               |
| <i>Occludin</i>  | GI:464148      | F: ACGGCAGCACCTACCTCAA<br>R: GGGCGAAGAAGCAGATGAG       |               |
| <i>ZO-1</i>      | XM_413773      | F: CTCAGGTGTTTCTCTTCCTCCTC<br>R: CTGTGGTTTCATGGCTGGATC |               |
| <i>Claudin-2</i> | NM_001277622.1 | F: CTGCTCACCTCATTGGA<br>R: AACTCACTCTTGGGCTTCTG        |               |
| <i>Claudin-3</i> | NM_204202.2    | F: CCAAGATCACCATCGTCTCC<br>R: CACCAGCGGGTTGTAGAAAT     |               |
| <i>Mucin-2</i>   | XM_421035      | F: TTCATGATGCCTGCTCTTGTG<br>R: CCTGAGCCTTGGTACATTCTTGT |               |
| <i>IL-1β</i>     | NM_204524      | F: ACTGGGCATCAAGGGCTA<br>R: GGTAGAAGATGAAGCGGGTC       |               |
| <i>IL-6</i>      | AJ250838       | F: GCTCGCCGGCTTCGA<br>R: GGTAGGTCTGAAAGGCGAACAG        |               |
| <i>IL-8</i>      | NC_006091.5    | F: GGTCTCGGAGCAGCGGATAG<br>R : GTCTCTGTGATGGAGCCATTCTG |               |
| <i>IL-17</i>     | NM_204460.1    | F: TATCAGCAAACGCTCACTGG<br>R: AGTTCACGCACCTGGAATG      |               |
| <i>TNF-α</i>     | NM_204267      | F: GAGCGTTGACTTGGCTGTC<br>R: AAGCAACAACCAGCTATGCAC     |               |
| <i>IFN-γ</i>     | NM_205149.1    | F: AGCTGACGGTGGACCTATTATT<br>R: GGCTTTGCGCTGGATTC      |               |
| <i>GLUT1</i>     | NM_205209.1    | F: TCCTCCTGATCAACCGCAAT<br>R: TGTGCCCCGGAGCTTCT        |               |
| <i>GLUT2</i>     | Z22932         | F: CACACTATGGGCGCATGCT<br>R: ATTGTGCCTGGAGGTGTTGGT     |               |
| <i>PepT1</i>     | NM_204365.1    | F: CCCCTGAGGAGGATCACTGTT<br>R: CAAAAGAGCAGCAGCAACGA    |               |
| <i>SGLT1</i>     | NM_001293240   | F: GCCATGGCCAGGGCTTA<br>R: CAATAACCTGATCTGTGCACCAGTA   |               |
| <i>TIR1</i>      | XM_425734.4    | F: GTGTCATCCCCACAACCAA<br>R: CACCACTGCCTCAAAGAAGG      |               |
| <i>TIR3</i>      | XM_425740.3    | F: CATTACCGTCTTCGCCACTC<br>R: CTCTGTTCAAATCGGGCTTC     |               |

*β-Actin* = Beta-actin; *IL-1β* = interleukin 1 beta; *IL-6* = interleukin 6; *IL-17* = interleukin 17; *NF-κB* = nuclear factor kappa B; *TNF-α* = tumor necrosis factor alpha; *IFN-γ* = interferon gamma; *GLUT1* = glucose transporter 1; *GLUT2* = glucose transporter 2; *PepT1* = Peptide transporter-1; *SGLT1* = sodium-glucose transporter 1; *TIR1* = taste receptor type 1 member 1; *TIR3* = taste receptor type 1 member 3.

**Table S4.** Information of *Bacillus* isolates from the chicken gut.

| ID                                       | Phylum     | Genus           | Species                           | Chicken Breed         | Origin             |
|------------------------------------------|------------|-----------------|-----------------------------------|-----------------------|--------------------|
| <b><i>Bacillus altitudinis</i></b>       |            |                 |                                   |                       |                    |
| CML488                                   | Firmicutes | <i>Bacillus</i> | <i>Bacillus altitudinis</i>       | Beijing fatty chicken | Beijing            |
| CML496                                   | Firmicutes | <i>Bacillus</i> | <i>Bacillus altitudinis</i>       | 817 chicken           | Yunfu, Guangdong   |
| CML500                                   | Firmicutes | <i>Bacillus</i> | <i>Bacillus altitudinis</i>       | Mahuanggong chicken   | Yunfu, Guangdong   |
| CML515                                   | Firmicutes | <i>Bacillus</i> | <i>Bacillus altitudinis</i>       | Aixiang chicken       | Yunfu, Guangdong   |
| CML522                                   | Firmicutes | <i>Bacillus</i> | <i>Bacillus altitudinis</i>       | Tuer chicken          | Yunfu, Guangdong   |
| CML525                                   | Firmicutes | <i>Bacillus</i> | <i>Bacillus altitudinis</i>       | Shanzhongxian hen     | Xuancheng, Anhui   |
| CML536                                   | Firmicutes | <i>Bacillus</i> | <i>Bacillus altitudinis</i>       | Shanzhongxian rooster | Xuancheng, Anhui   |
| CML540                                   | Firmicutes | <i>Bacillus</i> | <i>Bacillus altitudinis</i>       | Shiqi chicken         | Jinan, Shandong    |
| CML544                                   | Firmicutes | <i>Bacillus</i> | <i>Bacillus altitudinis</i>       | Luhua chicken         | Jinan, Shandong    |
| <b><i>Bacillus atrophaeus</i></b>        |            |                 |                                   |                       |                    |
| CML474                                   | Firmicutes | <i>Bacillus</i> | <i>Bacillus atrophaeus</i>        | Nongda third chicken  | Beijing            |
| CML527                                   | Firmicutes | <i>Bacillus</i> | <i>Bacillus atrophaeus</i>        | Shanzhongxian hen     | Xuancheng, Anhui   |
| <b><i>Bacillus cereus</i></b>            |            |                 |                                   |                       |                    |
| CML481                                   | Firmicutes | <i>Bacillus</i> | <i>Bacillus cereus</i>            | Nongda third chicken  | Beijing            |
| CML484                                   | Firmicutes | <i>Bacillus</i> | <i>Bacillus cereus</i>            | Green shell layer     | Beijing            |
| CML506                                   | Firmicutes | <i>Bacillus</i> | <i>Bacillus cereus</i>            | Jianghan chicken      | Wuhan, Hubei       |
| CML533                                   | Firmicutes | <i>Bacillus</i> | <i>Bacillus cereus</i>            | Shanzhongxian rooster | Xuancheng, Anhui   |
| <b><i>Bacillus licheniformis</i></b>     |            |                 |                                   |                       |                    |
| CML477                                   | Firmicutes | <i>Bacillus</i> | <i>Bacillus licheniformis</i>     | Nongda third chicken  | Beijing            |
| CML490                                   | Firmicutes | <i>Bacillus</i> | <i>Bacillus licheniformis</i>     | Beijing fatty chicken | Beijing            |
| CML493                                   | Firmicutes | <i>Bacillus</i> | <i>Bacillus licheniformis</i>     | 817 chicken           | Yunfu, Guangdong   |
| CML524                                   | Firmicutes | <i>Bacillus</i> | <i>Bacillus licheniformis</i>     | Tuer chicken          | Yunfu, Guangdong   |
| <b><i>Bacillus paralicheniformis</i></b> |            |                 |                                   |                       |                    |
| CML502                                   | Firmicutes | <i>Bacillus</i> | <i>Bacillus paralicheniformis</i> | Jianghan chicken      | Wuhan, Hubei       |
| CML514                                   | Firmicutes | <i>Bacillus</i> | <i>Bacillus paralicheniformis</i> | Aixiang chicken       | Yunfu, Guangdong   |
| CML519                                   | Firmicutes | <i>Bacillus</i> | <i>Bacillus paralicheniformis</i> | Yuqingxiang chicken   | Yunfu, Guangdong   |
| CML521                                   | Firmicutes | <i>Bacillus</i> | <i>Bacillus paralicheniformis</i> | Tuer chicken          | Yunfu, Guangdong   |
| CML538                                   | Firmicutes | <i>Bacillus</i> | <i>Bacillus paralicheniformis</i> | Bairi chicken         | Jinan, Shandong    |
| CML541                                   | Firmicutes | <i>Bacillus</i> | <i>Bacillus paralicheniformis</i> | Shiqi chicken         | Jinan, Shandong    |
| CML543                                   | Firmicutes | <i>Bacillus</i> | <i>Bacillus paralicheniformis</i> | Luhua chicken         | Wenshang, Shandong |
| CML547                                   | Firmicutes | <i>Bacillus</i> | <i>Bacillus paralicheniformis</i> | Langya chicken        | Langya, Shandong   |
| <b><i>Bacillus siamensis</i></b>         |            |                 |                                   |                       |                    |
| CML475                                   | Firmicutes | <i>Bacillus</i> | <i>Bacillus siamensis</i>         | Nongda third chicken  | Beijing            |
| CML492                                   | Firmicutes | <i>Bacillus</i> | <i>Bacillus siamensis</i>         | 817 chicken           | Yunfu, Guangdong   |
| CML499                                   | Firmicutes | <i>Bacillus</i> | <i>Bacillus siamensis</i>         | Mahuanggong chicken   | Yunfu, Guangdong   |
| CML503                                   | Firmicutes | <i>Bacillus</i> | <i>Bacillus siamensis</i>         | Jianghan chicken      | Wuhan, Hubei       |
| CML507                                   | Firmicutes | <i>Bacillus</i> | <i>Bacillus siamensis</i>         | Lueyang chicken       | Lueyang, Shanxi    |
| CML513                                   | Firmicutes | <i>Bacillus</i> | <i>Bacillus siamensis</i>         | Aixiang chicken       | Yunfu, Guangdong   |
| CML517                                   | Firmicutes | <i>Bacillus</i> | <i>Bacillus siamensis</i>         | Yuqingxiang chicken   | Yunfu, Guangdong   |
| <b><i>Bacillus tequilensis</i></b>       |            |                 |                                   |                       |                    |
| CML479                                   | Firmicutes | <i>Bacillus</i> | <i>Bacillus tequilensis</i>       | Nongda third chicken  | Beijing            |
| CML489                                   | Firmicutes | <i>Bacillus</i> | <i>Bacillus tequilensis</i>       | Beijing fatty chicken | Beijing            |
| CML491                                   | Firmicutes | <i>Bacillus</i> | <i>Bacillus tequilensis</i>       | 817 chicken           | Yunfu, Guangdong   |
| CML504                                   | Firmicutes | <i>Bacillus</i> | <i>Bacillus tequilensis</i>       | Jianghan chicken      | Wuhan, Hubei       |
| CML518                                   | Firmicutes | <i>Bacillus</i> | <i>Bacillus tequilensis</i>       | Yuqingxiang chicken   | Yunfu, Guangdong   |
| CML520                                   | Firmicutes | <i>Bacillus</i> | <i>Bacillus tequilensis</i>       | Tuer chicken          | Yunfu, Guangdong   |
| CML528                                   | Firmicutes | <i>Bacillus</i> | <i>Bacillus tequilensis</i>       | Shanzhongxian hen     | Xuancheng, Anhui   |

|                                   |            |                 |                                 |                       |                  |
|-----------------------------------|------------|-----------------|---------------------------------|-----------------------|------------------|
| CML534                            | Firmicutes | <i>Bacillus</i> | <i>Bacillus tequilensis</i>     | Shanzhongxian rooster | Xuancheng, Anhui |
| <b><i>Bacillus velezensis</i></b> |            |                 |                                 |                       |                  |
| CML532                            | Firmicutes | <i>Bacillus</i> | <i>Bacillus velezensis</i>      | Shanzhongxian rooster | Xuancheng, Anhui |
| CML526                            | Firmicutes | <i>Bacillus</i> | <i>Bacillus velezensis</i>      | Shanzhongxian hen     | Xuancheng, Anhui |
| CML537                            | Firmicutes | <i>Bacillus</i> | <i>Bacillus velezensis</i>      | Bairi chicken         | Jinan, Shandong  |
| CML539                            | Firmicutes | <i>Bacillus</i> | <i>Bacillus velezensis</i>      | Shiqi chicken         | Jinan, Shandong  |
| CML542                            | Firmicutes | <i>Bacillus</i> | <i>Bacillus velezensis</i>      | Luhua chicken         | Jinan, Shandong  |
| CML546                            | Firmicutes | <i>Bacillus</i> | <i>Bacillus velezensis</i>      | Langya chicken        | Langya, Shandong |
| <b>Others</b>                     |            |                 |                                 |                       |                  |
| CML476                            | Firmicutes | <i>Bacillus</i> | <i>Bacillus halotolerans</i>    | Nongda third chicken  | Beijing          |
| CML478                            | Firmicutes | <i>Bacillus</i> | <i>Bacillus aryabhattai</i>     | Nongda third chicken  | Beijing          |
| CML482                            | Firmicutes | <i>Bacillus</i> | <i>Bacillus bingmayongensis</i> | Nongda third chicken  | Beijing          |
| CML483                            | Firmicutes | <i>Bacillus</i> | <i>Bacillus circulans</i>       | Nongda third chicken  | Beijing          |
| CML494                            | Firmicutes | <i>Bacillus</i> | <i>Bacillus oleronius</i>       | 817 chicken           | Yunfu, Guangdong |
| CML495                            | Firmicutes | <i>Bacillus</i> | <i>Bacillus sonorensis</i>      | 817 chicken           | Yunfu, Guangdong |
| CML497                            | Firmicutes | <i>Bacillus</i> | <i>Bacillus fordii</i>          | 817 chicken           | Yunfu, Guangdong |
| CML501                            | Firmicutes | <i>Bacillus</i> | LDWH_s                          | Mahuanggong chicken   | Yunfu, Guangdong |
| CML505                            | Firmicutes | <i>Bacillus</i> | <i>Bacillus subtilis</i>        | Jiangnan chicken      | Wuhan, Hubei     |
| CML510                            | Firmicutes | <i>Bacillus</i> | <i>Bacillus marisflavi</i>      | Lueyang chicken       | Lueyang, Shanxi  |
| CML529                            | Firmicutes | <i>Bacillus</i> | <i>Bacillus wiedmannii</i>      | Shanzhongxian hen     | Xuancheng, Anhui |
| CML535                            | Firmicutes | <i>Bacillus</i> | <i>Bacillus hisashii</i>        | Shanzhongxian rooster | Xuancheng, Anhui |

**Table S5.** The annotation of resistance genes in *B. velezensis* CML532 genome.

| Resistance genes | Identity, % | Coverage rate, % | Start     | Stop      |
|------------------|-------------|------------------|-----------|-----------|
| <i>Cfr(B)</i>    | 89.09       | 98.67            | 570,335   | 571,384   |
| <i>tet(L)</i>    | 86.86       | 100.00           | 2,587,728 | 2,589,104 |



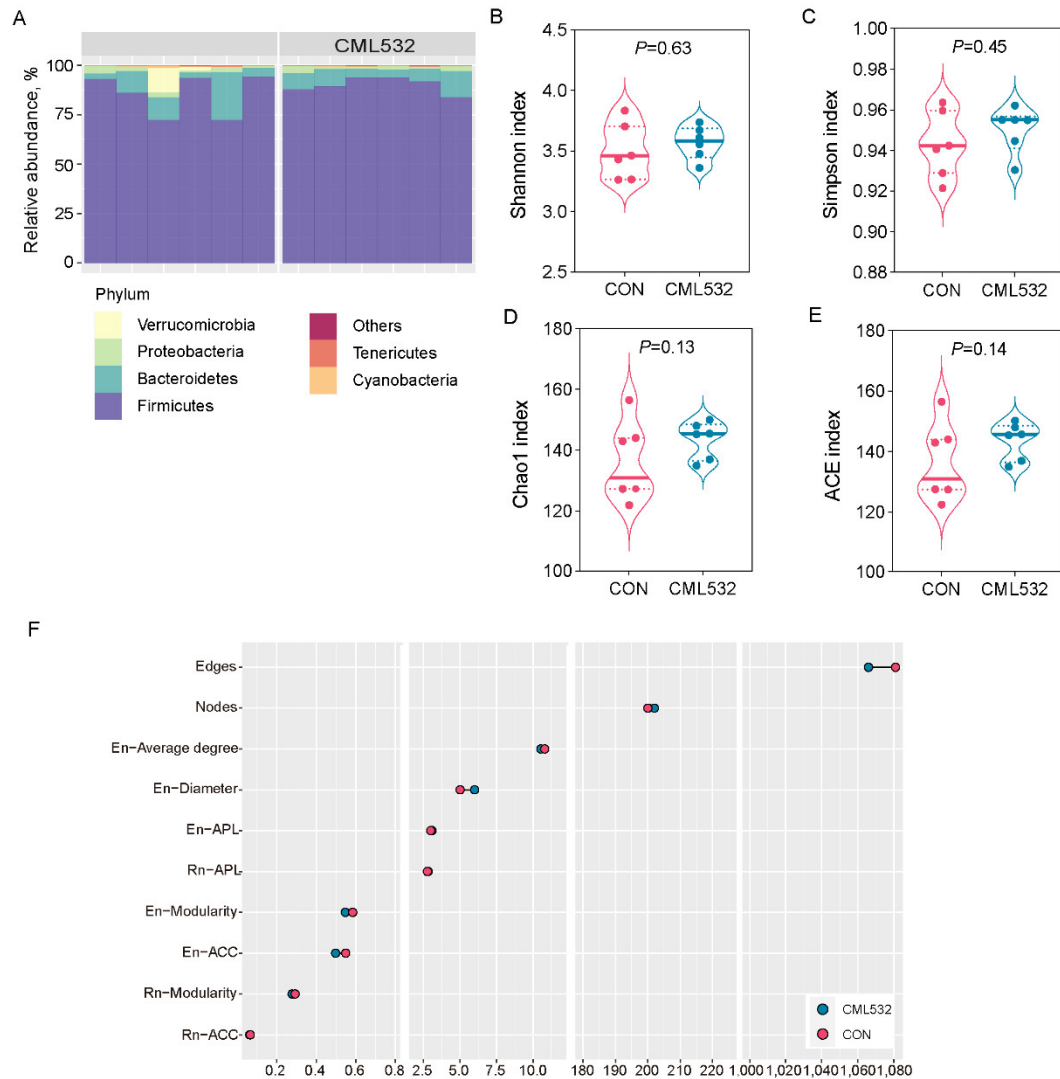

**Figure S1.** *B. velezensis* CML532 changes the cecal microbial community structure. **(A)** Relative abundance of major bacterial phylum. **(B–E)** Microbiome  $\alpha$ -diversity in *B. velezensis* CML532 and control groups at genus-level. **(F)** Empirical and randomized molecular ecology network properties of microbial communities under different treatment. Randomized networks were performed by rewiring all the nodes and links corresponding to empirical networks 1,000 times. En: Empirical network. Rn: Randomized networks. ACC: Average clustering coefficient. APL: Average path distance.
